# Supplementary material for: Impact of Long Working Hours and Shift Work on Perceived Unmet Dental Need: A Panel Study
Source: MDPI journal article supplement (doi:10.3390/ijerph18062939), 2021-03-13
Supplement: s1 [file s1]

**Table S1.** Average weekly working hours and prevalence of shift work by population characteristics in 2009 (N=3398)

|                                             | Weekly working hours<br>(mean±SD) | Shift work (%) |
|---------------------------------------------|-----------------------------------|----------------|
| Perceived unmet dental need                 |                                   |                |
| No                                          | 47.1±14.9                         | 15.2           |
| Yes                                         | 46.0±16.1                         | 14.7           |
| Unmet dental need due to financial issue    |                                   |                |
| No                                          | 47.0±15.1                         | 15.0           |
| Yes                                         | 43.0±18.8                         | 15.3           |
| Unmet dental need due to time scarcity      |                                   |                |
| No                                          | 46.5±15.4                         | 15.6           |
| Yes                                         | 49.4±13.7                         | 10.7           |
| Sex                                         |                                   |                |
| Men                                         | 50.1±14.1                         | 17.5           |
| Women                                       | 42.5±15.7                         | 11.8           |
| Age (y)                                     |                                   |                |
| <30                                         | 46.9±14.8                         | 19.0           |
| 30-39                                       | 47.6±14.2                         | 13.1           |
| 40-49                                       | 46.9±14.5                         | 12.9           |
| 50-59                                       | 46.0±15.0                         | 14.3           |
| ≥60                                         | 46.1±20.7                         | 23.6           |
| Marital status                              |                                   |                |
| Single or living alone                      | 45.9±15.3                         | 17.7           |
| Married or living with partner              | 47.2±15.2                         | 14.1           |
| Education                                   |                                   |                |
| Lower than high school diploma              | 46.0±18.0                         | 15.9           |
| High school diploma                         | 47.5±14.9                         | 17.7           |
| Undergraduate and higher                    | 46.2±13.5                         | 9.6            |
| Household income                            |                                   |                |
| Q1 (Lowest)                                 | 38.8±20.0                         | 9.5            |
| Q2                                          | 46.2±17.4                         | 17.3           |
| Q3                                          | 47.6±16.3                         | 14.1           |
| Q4                                          | 48.4±14.4                         | 17.7           |
| Q5 (Highest)                                | 46.3±12.5                         | 12.9           |
| Employment status                           |                                   |                |
| Full-time, regular                          | 49.5±11.0                         | 14.8           |
| Part-time, day worker, etc.                 | 43.3±19.0                         | 15.4           |
| Occupation                                  |                                   |                |
| Legislators, senior officials, and managers | 47.0±9.8                          | 6.9            |
| Professionals                               | 45.0±13.6                         | 10.0           |
| Technicians and associate professionals     | 46.0±9.5                          | 5.2            |
| Clerks                                      | 50.2±20.9                         | 31.7           |
| Service and sale workers                    | 44.9±18.2                         | 13.1           |
| Agricultural, forestry, and fishery workers | 53.3±17.2                         | 18.8           |
| Craft and related trades workers            | 49.1±13.0                         | 10.4           |
| Plant, machine operators, and assemblers    | 52.2±13.4                         | 33.6           |
| Elementary occupations                      | 44.3±18.1                         | 16.8           |

|                     |           |
|---------------------|-----------|
| Weekly working hour |           |
| <40                 | 9.3       |
| 40-52               | 11.5      |
| >52                 | 24.3      |
| Shift work          |           |
| No                  | 45.5±13.9 |
| Yes                 | 54.2±19.8 |

**Table S2.** Results from Fixed effect logit models for the association between working hours and perceived unmet dental need due to financial issue

|                                             | Men  |              | Women |              |
|---------------------------------------------|------|--------------|-------|--------------|
|                                             | OR   | 95% CI       | OR    | 95% CI       |
| Weekly working hour                         |      |              |       |              |
| <40                                         | 0.92 | 0.55 - 1.55  | 1.69  | 1.13 - 2.53  |
| 40-52                                       | 1.00 |              | 1.00  |              |
| >52                                         | 0.90 | 0.61 - 1.34  | 1.06  | 0.66 - 1.69  |
| Shift work                                  |      |              |       |              |
| No                                          | 1.00 |              |       |              |
| Yes                                         | 1.39 | 0.80 - 2.39  | 0.92  | 0.51 - 1.64  |
| Age                                         |      |              |       |              |
|                                             | 0.94 | 0.86 - 1.02  | 0.92  | 0.85 - 1.00  |
| Marital status                              |      |              |       |              |
| Single or living alone                      | 1.00 |              | 1.00  |              |
| Married or living with partner              | 0.36 | 0.06 - 2.00  | 0.87  | 0.30 - 2.54  |
| Education                                   |      |              |       |              |
| Lower than high school diploma              | -    |              | -     |              |
| High school diploma                         | -    |              | 1.63  | 0.11 - 23.67 |
| Undergraduate and higher                    | 1.00 |              | 1.00  |              |
| Household income                            |      |              |       |              |
| Q1 (lowest)                                 | 2.79 | 0.98 - 7.96  | 3.34  | 1.29 - 8.65  |
| Q2                                          | 2.33 | 0.94 - 5.77  | 2.07  | 0.88 - 4.89  |
| Q3                                          | 1.94 | 0.84 - 4.46  | 1.71  | 0.76 - 3.85  |
| Q4                                          | 1.61 | 0.73 - 3.56  | 1.55  | 0.75 - 3.20  |
| Q5 (highest)                                | 1.00 |              | 1.00  |              |
| Employment status                           |      |              |       |              |
| Full-time, regular                          | 1.00 |              | 1.00  |              |
| Other                                       | 1.35 | 0.83 - 2.22  | 1.31  | 0.80 - 2.14  |
| Occupation                                  |      |              |       |              |
| Legislators, senior officials, and managers | 1.00 |              | 1.00  |              |
| Professionals                               | 0.85 | 0.12 - 6.07  | 0.17  | 0.02 - 1.58  |
| Technicians and associate professionals     | 3.54 | 0.84 - 14.97 | 0.46  | 0.06 - 3.63  |
| Clerks                                      | 4.16 | 0.67 - 25.95 | 0.22  | 0.03 - 1.71  |

|                                             |      |             |      |             |
|---------------------------------------------|------|-------------|------|-------------|
| Service and sale workers                    | 1.16 | 0.24 - 5.65 | 0.50 | 0.06 - 3.87 |
| Agricultural, forestry, and fishery workers | -    |             | 0.26 | 0.01 - 8.67 |
| Craft and related trades workers            | 1.57 | 0.46 - 5.37 | 0.14 | 0.01 - 1.61 |
| Plant, machine operators, and assemblers    | 2.20 | 0.55 - 8.77 | 0.15 | 0.01 - 2.19 |
| Elementary occupations                      | 1.71 | 0.47 - 6.25 | 0.21 | 0.03 - 1.66 |

---
